# Supplementary material for: Antimicrobial Potential of Biosynthesized Zinc Oxide Nanoparticles Using Banana Peel and Date Seeds Extracts
Source: MDPI journal article supplement (doi:10.3390/su15119048), 2023-06-03
Supplement: s1 [file s1]

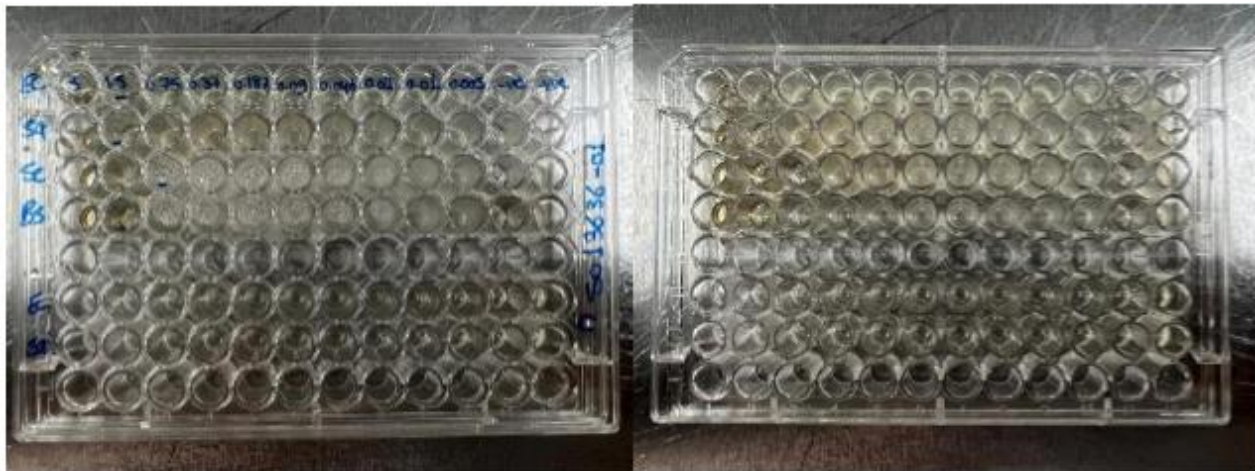

**Figure S1:** Effect of ZnONPs\_BPE on *Escherichia coli* ATCC 8739, *Staphylococcus aureus* ATCC 6538, *Bacillus subtilis* ATCC 6633, and *Salmonella enteritidis* ATCC 13076.

| Dilution (mg/ml)              | 3 | 1.5 | 0.75 | 0.375 | 0.187 | 0.09 | 0.04 | 0.02 | 0.01 | 0.005 |
|-------------------------------|---|-----|------|-------|-------|------|------|------|------|-------|
| <i>Escherichia coli</i>       | C | C   | T    | T     | T     | T    | T    | T    | T    | T     |
| <i>Staphylococcus aureus</i>  | C | C   | T    | T     | T     | T    | T    | T    | T    | T     |
| <i>Bacillus subtilis</i>      | C | C   | T    | T     | T     | T    | T    | T    | T    | T     |
| <i>Salmonella enteritidis</i> | C | C   | C    | T     | T     | T    | T    | T    | T    | T     |

**Table S1:** MIC reading Figure S1 shows effect of ZnONPs\_BPE on *Escherichia coli* ATCC 8739, *Staphylococcus aureus* ATCC 6538, *Bacillus subtilis* ATCC 6633, and *Salmonella enteritidis* ATCC 13076.

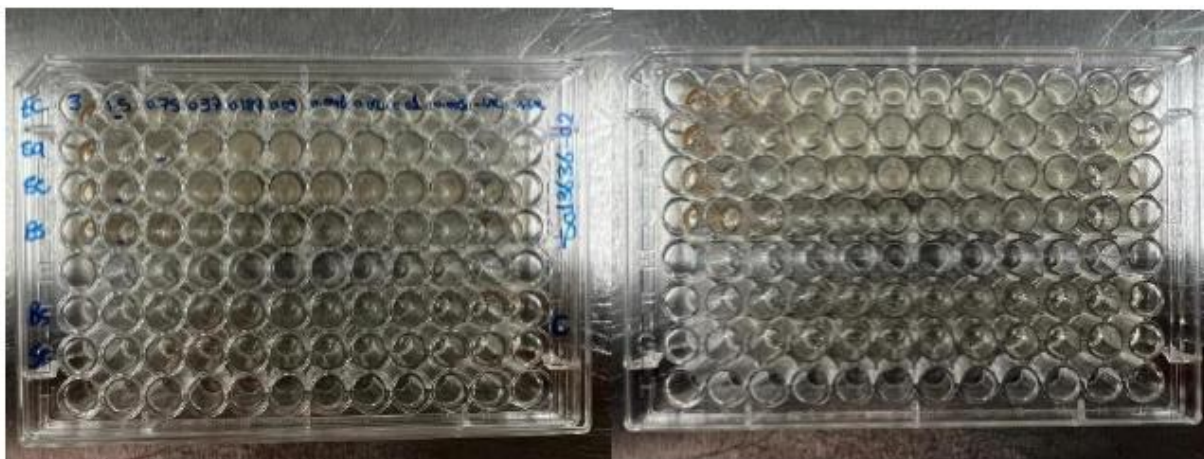

**Figure S2:** Effect of ZnONPs\_DSE on *Escherichia coli* ATCC 8739, *Staphylococcus aureus* ATCC 6538, *Bacillus subtilis* ATCC 6633, and *Salmonella enteritidis* ATCC 13076.

| Dilution (mg/ml)              | 3 | 1.5 | 0.75 | 0.375 | 0.187 | 0.09 | 0.04 | 0.02 | 0.01 | 0.005 |
|-------------------------------|---|-----|------|-------|-------|------|------|------|------|-------|
| <i>Escherichia coli</i>       | C | C   | T    | T     | T     | T    | T    | T    | T    | T     |
| <i>Staphylococcus aureus</i>  | C | C   | C    | T     | T     | T    | T    | T    | T    | T     |
| <i>Bacillus subtilis</i>      | C | C   | T    | T     | T     | T    | T    | T    | T    | T     |
| <i>Salmonella enteritidis</i> | C | C   | T    | T     | T     | T    | T    | T    | T    | T     |

**Table S2:** MIC reading Figure S1 shows effect of ZnONPs\_DSE on *Escherichia coli* ATCC 8739, *Staphylococcus aureus* ATCC 6538, *Bacillus subtilis* ATCC 6633, and *Salmonella enteritidis* ATCC 13076.
